# Supplementary material
Source: publisher site journal article supplement (https://www.dovepress.com/article/508169)
Supplement: Supplementary file 1 [file get_supplementary_file.php]

# Supplemental Appendix A

## Supplemental Appendix A, Table 1: Procedure codes for abdominal and orthopedic surgery

| **Procedure Type** | **Procedure Subtype** | **Anatomy** | **Codes** | **Description** | **Code Type** |
| --- | --- | --- | --- | --- | --- |
| Abdominal Surgery | General Surgery  (Note: Colorectal surgery is defined as a subgroup of general surgery comprised of procedures of the colon and intestine, or appendix) | Abdominal wall or muscle | 0W*F0%, 0K*K0%, 0K*L0% | Procedure on abdominal wall, or abdomen muscle (right, left) | ICD-10-PCS |
| Appendix | 0D*J0% | Procedure on appendix | ICD-10-PCS |
| Colon and intestine | 0D*80%, 0D*A0%, 0D*B0%, 0D*C0%, 0D*D0%, 0D*E0%, 0D*F0%, 0D*G0%, 0D*H0%, 0D*K0%, 0D*L0%, 0D*M0%, 0D*N0%, 0D*P0%, 0D*Q0%, 0D*R0%, 0D*S0%, 0D*U0%, 0D*V0%, 0D*W0%, 0W*G0%, 0W*H0%, 0W*J0%, 0W*P0% | Procedure on small intestine, jejunum, ileum, ileocecal valve, large intestine, cecum, ascending colon, transverse colon, descending colon, sigmoid colon, rectum, omentum, mesentery, peritoneum, retroperitoneum, pelvic cavity, or gastrointestinal tract | ICD-10-PCS |
| Hernia | 0YUA%, 0YU5%, 0YU6%, 0YQA%, 0YQ5%, 0YQ6% | Supplement or repair inguinal region (right, left, bilateral) | ICD-10-PCS |
| Stomach | 0D*60%, 0D*70%, 0D*90% | Procedure on gastrointestinal system (stomach, duodenum) | ICD-10-PCS |
| Gallbladder | 0F*40%, 0F*80%, 0F*90%, 0F*B0% | Procedure on gallbladder, cystic duct, common bile duct, or hepatobiliary duct | ICD-10-PCS |
| Liver | 0F*00%, 0F*10%, 0F*20%, 0F*50%, 0F*60%, 0F*70% | Procedure on liver or hepatic duct | ICD-10-PCS |
| Pancreas | 0F*C0%, 0F*D0%, 0F*F0%, 0F*G0% | Procedure on Ampulla of Vater, pancreatic duct, pancreas, or pancreatic duct, accessory | ICD-10-PCS |
| Spleen | 07*P0% | Procedure on spleen | ICD-10-PCS |
| Gynecologic Surgery | Cervix and uterus | 0U*40%, 0U*90%, 0U*C0%, 0U*D0% | Operation on uterine supporting structure, uterus, cervix, or uterus and cervix | ICD-10-PCS |
| Obstetrics | 10D_0% | C-section | ICD-10-PCS |
| Ovaries and fallopian tubes | 0U*00%, 0U*10%, 0U*20%, 0U*30%, 0U*50%, 0U*60%, 0U*70%, 0U*80% | Operation on ovary or fallopian tubes (right, left, bilateral) | ICD-10-PCS |
| Urologic Surgery | Bladder | 0T*60%, 0T*70%, 0T*80%, 0T*B0%, 0T*C0%, 0T*D0% | Procedure on ureter, bladder, or urethra | ICD-10-PCS |
| Kidney | 0T*00%, 0T*10%, 0T*20%, 0T*30%, 0T*40% | Procedure on kidney (right, left, bilateral), or kidney pelvis (right, left) | ICD-10-PCS |
| Prostate | 0V*00% | Procedure on prostate | ICD-10-PCS |
| Orthopedic Surgery | Spinal Fusion Surgery | Spine | 0SG0%, 0SG1%, 0SG2%, 0SG3%, 0SG4%, 0RG1%, 0RG2%, 0RG3%, 0RG4%, 0RG5%, 0RG6%, 0RG7%, 0RG8%, 0RG9%, 0RGA%, 0RGB% | Fusion of lumbar vertebral, lumbosacral, cervical vertebral, or cervicothoracic, thoracic vertebral, thoracolumbar vertebral joint or disk | ICD-10-PCS |
| Hip Arthroplasty | Hip, partial | 0SRA0%, 0SRE0%, 0SRR0%, 0SRS0% | Replacement of hip joint, (right, left), acetabular/femoral surface | ICD-10-PCS |
| Hip, total | 0SR90%, 0SRB0% | Replacement of hip joint (right, left) | ICD-10-PCS |
| Knee Arthroplasty | Knee, total | 0SRC0%, 0SRD0%, 0SRT0%, 0SRU0%, 0SRV0%, 0SRW0% (except 0SRC0L9, 0SRC0LA, 0SRC0LZ, 0SRC0M9, 0SRC0MA, 0SRC0MZ, 0SRD0L9, 0SRD0LA, 0SRD0LZ, 0SRD0M9, 0SRD0MA, 0SRD0MZ) | Replacement of knee joint (right, left) | ICD-10-PCS |
| Knee, unicompartmental | 0SRC0L9, 0SRC0LA, 0SRC0LZ, 0SRC0M9, 0SRC0MA, 0SRC0MZ, 0SRD0L9, 0SRD0LA, 0SRD0LZ, 0SRD0M9, 0SRD0MA, 0SRD0MZ | Replacement of knee joint (right, left) with medial unicondylar synthetic substitute | ICD-10-PCS |

**Abbreviations:** ICD-10-PCS: International Classification of Diseases, Tenth Revision, Procedure Coding System

*: Value of 1 (Bypass), 5 (Destruction), 7 (Dilation), B (Excision), C (Extirpation), D (Extraction), J (Inspection), N (Release), Q (Repair), S (Reposition), T (Resection), U (Supplement) or Y (Transplantation) for character at current position

_: Any value for character at current position

%: Any value for subsequent characters

## Supplemental Appendix A, Table 2: Codes for surgical outcomes of interest

| **Surgical Outcome** | **Code type** | **Code** | **Code description** |
| --- | --- | --- | --- |
| Internal Wound Dehiscence | ICD-10-CM | T81.32XA | Disruption of internal operation (surgical) wound, not elsewhere classified, subsequent encounter, initial encounter |
| ICD-10-CM | T81.32XD | Disruption of internal operation (surgical) wound, not elsewhere classified, subsequent encounter |
| ICD-10-CM | T81.32XS | Disruption of internal operation (surgical) wound, not elsewhere classified, subsequent encounter, sequela |
| Surgical Site Infection | ICD-10-CM | T81.4XXA | Infection following a procedure, initial encounter |
| ICD-10-CM | T81.4XXD | Infection following a procedure, subsequent encounter |
| ICD-10-CM | T81.4XXS | Infection following a procedure, sequela |
| ICD-10-CM | T81.40XA | Infection following a procedure, unspecified, initial encounter |
| ICD-10-CM | T81.40XD | Infection following a procedure, unspecified, subsequent encounter |
| ICD-10-CM | T81.40XS | Infection following a procedure, unspecified, sequela |
| ICD-10-CM | T81.41XA | Infection following a procedure, superficial incisional surgical site, initial encounter |
| ICD-10-CM | T81.41XD | Infection following a procedure, superficial incisional surgical site, subsequent encounter |
| ICD-10-CM | T81.41XS | Infection following a procedure, superficial incisional surgical site, sequela |
| ICD-10-CM | T81.42XA | Infection following a procedure, deep incisional surgical site, initial encounter |
| ICD-10-CM | T81.42XD | Infection following a procedure, deep incisional surgical site, subsequent encounter |
| ICD-10-CM | T81.42XS | Infection following a procedure, deep incisional surgical site, sequela |
| ICD-10-CM | T81.43XA | Infection following a procedure, organ and space surgical site, initial encounter |
| ICD-10-CM | T81.43XD | Infection following a procedure, organ and space surgical site, subsequent encounter |
| ICD-10-CM | T81.43XS | Infection following a procedure, organ and space surgical site, sequela |
| ICD-10-CM | T81.49XA | Infection following a procedure, other surgical site, initial encounter |
| ICD-10-CM | T81.49XD | Infection following a procedure, other surgical site, subsequent encounter |
| ICD-10-CM | T81.49XS | Infection following a procedure, other surgical site, sequela |

ICD-10-CM: International Classification of Diseases, Tenth Revision, Clinical Modification

# Supplemental Appendix B

## Supplemental Appendix B, Table 1: Characteristics of patients undergoing general, gynecologic, urologic, or colorectal surgery

|  | **General Surgery** | | **Gynecologic Surgery** | | **Urologic Surgery** | | **Colorectal Surgery** | |
| --- | --- | --- | --- | --- | --- | --- | --- | --- |
|  | **N** | **%** | **N** | **%** | **N** | **%** | **N** | **%** |
| **Total Number of Patients** | 4,301 | 100.00% | 2,735 | 100.00% | 1,120 | 100.00% | 3,134 | 100.00% |
| **Age, years** |  |  |  |  |  |  |  |  |
| Mean (SD) | 62.82 (14.74) | | 44.19 (16.40) | | 58.53 (15.01) | | 63.04 (14.89) | |
| **Age, years** |  |  |  |  |  |  |  |  |
| 18-54 | 1,112 | 25.85% | 1,981 | 72.43% | 417 | 37.23% | 816 | 26.04% |
| 55-64 | 1,033 | 24.02% | 346 | 12.65% | 277 | 24.73% | 733 | 23.39% |
| 65-74 | 1,195 | 27.78% | 276 | 10.09% | 264 | 23.57% | 854 | 27.25% |
| 75+ | 961 | 22.34% | 132 | 4.83% | 162 | 14.46% | 731 | 23.32% |
| **Sex** |  |  |  |  |  |  |  |  |
| Female | 2,414 | 56.13% | 2,735 | 100.00% | 391 | 34.91% | 1,790 | 57.12% |
| Male | 1,887 | 43.87% | 0 | 0.00% | 729 | 65.09% | 1,344 | 42.88% |
| **Race** |  |  |  |  |  |  |  |  |
| White | 3,434 | 81.41% | 1,161 | 43.34% | 635 | 62.44% | 2,565 | 83.20% |
| Black | 439 | 10.41% | 707 | 26.39% | 260 | 25.57% | 332 | 10.77% |
| Other | 345 | 8.18% | 811 | 30.27% | 122 | 12.00% | 186 | 6.03% |
| Unknown | 83 | - | 56 | - | 103 | - | 51 | - |
| **Payor Type** |  |  |  |  |  |  |  |  |
| Commercial | 1,479 | 34.39% | 1,461 | 53.42% | 335 | 29.91% | 1,147 | 36.60% |
| Medicare | 2,237 | 52.01% | 476 | 17.40% | 729 | 65.09% | 1,614 | 51.50% |
| Medicaid | 379 | 8.81% | 639 | 23.36% | 27 | 2.41% | 237 | 7.56% |
| Other | 206 | 4.79% | 159 | 5.81% | 29 | 2.59% | 136 | 4.34% |
| **Elixhauser Comorbidity Index** |  |  |  |  |  |  |  |  |
| 0-1 | 884 | 20.55% | 1,531 | 55.98% | 60 | 5.36% | 688 | 21.95% |
| 2-4 | 2,133 | 49.59% | 966 | 35.32% | 683 | 60.98% | 1,539 | 49.11% |
| 5+ | 1,284 | 29.85% | 238 | 8.70% | 377 | 33.66% | 907 | 28.94% |
| **Year of Index Event** |  |  |  |  |  |  |  |  |
| 2016† | 57 | 1.33% | 60 | 2.19% | 0 | 0.00% | 50 | 1.60% |
| 2017 | 315 | 7.32% | 262 | 9.58% | 80 | 7.14% | 276 | 8.81% |
| 2018 | 414 | 9.63% | 251 | 9.18% | 144 | 12.86% | 331 | 10.56% |
| 2019 | 537 | 12.49% | 321 | 11.74% | 168 | 15.00% | 417 | 13.31% |
| 2020 | 545 | 12.67% | 408 | 14.92% | 175 | 15.63% | 411 | 13.11% |
| 2021 | 753 | 17.51% | 552 | 20.18% | 174 | 15.54% | 511 | 16.31% |
| 2022 | 870 | 20.23% | 516 | 18.87% | 205 | 18.30% | 610 | 19.46% |
| 2023†† | 810 | 18.83% | 365 | 13.35% | 174 | 15.54% | 528 | 16.85% |
| **Procedure Subtype and Anatomical Site** |  |  |  |  |  |  |  |  |
| General Surgery | 4,301 | 100.00% | - | - | - | - | 3,134 | 100.00% |
| - Abdominal Wall or Muscle | 438 | 10.18% | - | - | - | - | - | - |
| - Appendix | 28 | 0.65% | - | - | - | - | 28 | 0.89% |
| - Colon and Intestine | 3,106 | 72.22% | - | - | - | - | 3,106 | 99.11% |
| - Hernia | 15 | 0.35% | - | - | - | - | - | - |
| - Stomach | 216 | 5.02% | - | - | - | - | - | - |
| - Gallbladder | 86 | 2.00% | - | - | - | - | - | - |
| - Liver | 139 | 3.23% | - | - | - | - | - | - |
| - Pancreas | 235 | 5.46% | - | - | - | - | - | - |
| - Spleen | 38 | 0.88% | - | - | - | - | - | - |
| Gynecologic Surgery | - | - | 2,735 | 100.00% | - | - | - | - |
| - Cervix and Uterus | - | - | 1,315 | 48.08% | - | - | - | - |
| - Obstetrics | - | - | 1,017 | 37.18% | - | - | - | - |
| - Ovaries and Fallopian tubes | - | - | 403 | 14.73% | - | - | - | - |
| Urologic Surgery | - | - | - | - | 1,120 | 100.00% | - | - |
| - Bladder | - | - | - | - | 317 | 28.30% | - | - |
| - Kidney | - | - | - | - | 759 | 67.77% | - | - |
| - Prostate | - | - | - | - | 44 | 3.93% | - | - |
| **Admission Type** |  |  |  |  |  |  |  |  |
| Elective | 2,458 | 57.18% | 2,079 | 76.07% | 611 | 54.55% | 1,688 | 53.90% |
| Emergency | 1,522 | 35.40% | 255 | 9.33% | 79 | 7.05% | 1,235 | 39.43% |
| Urgent | 301 | 7.00% | 398 | 14.56% | 429 | 38.30% | 195 | 6.23% |
| Trauma | 18 | 0.42% | 1 | 0.04% | 1 | 0.09% | 14 | 0.45% |
| Unknown | 2 | - | 2 | - | 0 | - | 2 | - |
| **Hospital Bed Size** |  |  |  |  |  |  |  |  |
| <100 | 202 | 4.70% | 25 | 0.91% | 0 | 0.00% | 45 | 1.44% |
| 100-199 | 721 | 16.76% | 665 | 24.31% | 8 | 0.71% | 638 | 20.36% |
| 200-299 | 342 | 7.95% | 10 | 0.37% | 0 | 0.00% | 280 | 8.93% |
| 300-399 | 925 | 21.51% | 1,065 | 38.94% | 53 | 4.73% | 429 | 13.69% |
| 400-499 | 171 | 3.98% | 4 | 0.15% | 1 | 0.09% | 152 | 4.85% |
| 500+ | 1,940 | 45.11% | 966 | 35.32% | 1,058 | 94.46% | 1,590 | 50.73% |
| **Hospital Location** |  |  |  |  |  |  |  |  |
| Urban | 4,235 | 98.47% | 2,731 | 99.85% | 1,120 | 100.00% | 3,086 | 98.47% |
| Rural | 66 | 1.53% | 4 | 0.15% | 0 | 0.00% | 48 | 1.53% |
| **Hospital Teaching Status** |  |  |  |  |  |  |  |  |
| Teaching | 3,062 | 71.19% | 2,512 | 91.85% | 1,099 | 98.13% | 2,342 | 74.73% |
| Non-Teaching | 1,239 | 28.81% | 223 | 8.15% | 21 | 1.88% | 792 | 25.27% |

**Abbreviations:** CI: confidence interval; SD: standard deviation

†: Data from between October 1, 2016 to December 31, 2016

††: Data from January 1, 2023 to October 31, 2023

## Supplemental Appendix B, Table 2: Characteristics of patients undergoing spinal fusion surgery, hip arthroplasty, or knee arthroplasty

|  | **Spinal Fusion Surgery** | | **Hip Arthroplasty** | | **Knee Arthroplasty** | |
| --- | --- | --- | --- | --- | --- | --- |
|  | **N** | **%** | **N** | **%** | **N** | **%** |
| **Total Number of Patients** | 2,877 | 100.00% | 12,442 | 100.00% | 10,488 | 100.00% |
| **Age, years** |  |  |  |  |  |  |
| Mean (SD) | 62.30 (13.43) | | 71.09 (11.82) | | 68.29 (9.64) | |
| **Age, years** |  |  |  |  |  |  |
| 18-54 | 695 | 24.16% | 1,101 | 8.85% | 875 | 8.34% |
| 55-64 | 745 | 25.90% | 2,354 | 18.92% | 2,574 | 24.54% |
| 65-74 | 926 | 32.19% | 3,829 | 30.77% | 4,213 | 40.17% |
| 75+ | 511 | 17.76% | 5,158 | 41.46% | 2,826 | 26.95% |
| **Sex** |  |  |  |  |  |  |
| Female | 1,416 | 49.22% | 7,564 | 60.79% | 6,390 | 60.93% |
| Male | 1,461 | 50.78% | 4,878 | 39.21% | 4,098 | 39.07% |
| **Race** |  |  |  |  |  |  |
| White | 2,289 | 82.84% | 10,735 | 88.39% | 9,264 | 89.62% |
| Black | 281 | 10.17% | 621 | 5.11% | 672 | 6.50% |
| Other | 193 | 6.99% | 789 | 6.50% | 401 | 3.88% |
| Unknown | 114 | - | 297 | - | 151 | - |
| **Payor Type** |  |  |  |  |  |  |
| Commercial | 933 | 32.43% | 2,713 | 21.81% | 2,904 | 27.69% |
| Medicare | 1,526 | 53.04% | 8,607 | 69.18% | 6,825 | 65.07% |
| Medicaid | 183 | 6.36% | 508 | 4.08% | 293 | 2.79% |
| Other | 235 | 8.17% | 614 | 4.93% | 466 | 4.44% |
| **Elixhauser Comorbidity Index** |  |  |  |  |  |  |
| 0-1 | 817 | 28.40% | 3,491 | 28.06% | 2,664 | 25.40% |
| 2-4 | 1,555 | 54.05% | 6,408 | 51.50% | 6,149 | 58.63% |
| 5+ | 505 | 17.55% | 2,543 | 20.44% | 1,675 | 15.97% |
| **Year of Index Event** |  |  |  |  |  |  |
| 2016† | 81 | 2.82% | 176 | 1.41% | 284 | 2.71% |
| 2017 | 257 | 8.93% | 1,280 | 10.29% | 1,578 | 15.05% |
| 2018 | 257 | 8.93% | 1,675 | 13.46% | 1,483 | 14.14% |
| 2019 | 360 | 12.51% | 2,500 | 20.09% | 2,390 | 22.79% |
| 2020 | 428 | 14.88% | 1,796 | 14.43% | 1,372 | 13.08% |
| 2021 | 412 | 14.32% | 1,564 | 12.57% | 1,102 | 10.51% |
| 2022 | 556 | 19.33% | 1,918 | 15.42% | 1,296 | 12.36% |
| 2023†† | 526 | 18.28% | 1,533 | 12.32% | 983 | 9.37% |
| **Procedure Subtype and Anatomical Site** |  |  |  |  |  |  |
| Spinal Fusion Surgery | 2,877 | 100.00% | - | - | - | - |
| - Spine | 2,877 | 100.00% | - | - | - | - |
| Hip Arthroplasty | - | - | 12,442 | 100.00% | - | - |
| - Hip, total | - | - | 9,356 | 75.20% | - | - |
| - Hip, partial | - | - | 3,086 | 24.80% | - | - |
| Knee Arthroplasty | - | - | - | - | 10,488 | 100.00% |
| - Knee, total | - | - | - | - | 10,405 | 99.21% |
| - Knee, unicompartmental | - | - | - | - | 83 | 0.79% |
| **Admission Type** |  |  |  |  |  |  |
| Elective | 2,392 | 83.46% | 8,138 | 65.44% | 10,262 | 97.85% |
| Emergency | 325 | 11.34% | 3,331 | 26.79% | 140 | 1.33% |
| Urgent | 109 | 3.80% | 835 | 6.71% | 82 | 0.78% |
| Trauma | 40 | 1.40% | 131 | 1.05% | 3 | 0.03% |
| Unknown | 11 | - | 7 | - | 1 | - |
| **Hospital Bed Size** |  |  |  |  |  |  |
| <100 | 140 | 4.87% | 712 | 5.72% | 612 | 5.84% |
| 100-199 | 424 | 14.74% | 1,561 | 12.55% | 1,010 | 9.63% |
| 200-299 | 249 | 8.65% | 4,659 | 37.45% | 3,193 | 30.44% |
| 300-399 | 561 | 19.50% | 2,153 | 17.30% | 3,265 | 31.13% |
| 400-499 | 569 | 19.78% | 1,613 | 12.96% | 1,152 | 10.98% |
| 500+ | 934 | 32.46% | 1,744 | 14.02% | 1,256 | 11.98% |
| **Hospital Location** |  |  |  |  |  |  |
| Urban | 2,728 | 94.82% | 10,901 | 87.61% | 8,854 | 84.42% |
| Rural | 149 | 5.18% | 1,541 | 12.39% | 1,634 | 15.58% |
| **Hospital Teaching Status** |  |  |  |  |  |  |
| Teaching | 2,013 | 69.97% | 4,992 | 40.12% | 4,814 | 45.90% |
| Non-Teaching | 864 | 30.03% | 7,450 | 59.88% | 5,674 | 54.10% |

**Abbreviations:** CI: confidence interval; SD: standard deviation

†: Data from between October 1, 2016 to December 31, 2016

††: Data from January 1, 2023 to October 31, 2023
